Correction

# Correction: Newborn Boys and Girls Differ in the Lipid Composition of Vernix Caseosa

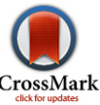

## The PLOS ONE Staff

There are errors in the Funding Statement. The correct funding is as follows: “Funding for this project was provided by Czech Science Foundation (Project No. 206/12/0750), Academy of Sciences of the Czech Republic (Project RVO 61388963) and Charles University in Prague (Project SVV 260084). The funders had no role in study design, data collection and analysis, decision to publish, or preparation of the manuscript.”

## Reference

1. Míková R, Vrkoš V, Hanus R, Háková E, Hábová Z, et al. (2014) Newborn Boys and Girls Differ in the Lipid Composition of Vernix Caseosa. PLoS ONE 9(6): e99173. doi:10.1371/journal.pone.0099173

**Citation:** The PLOS ONE Staff (2014) Correction: Newborn Boys and Girls Differ in the Lipid Composition of Vernix Caseosa. PLoS ONE 9(9): e107847. doi:10.1371/journal.pone.0107847

**Published:** September 8, 2014

**Copyright:** © 2014 The PLOS ONE Staff. This is an open-access article distributed under the terms of the Creative Commons Attribution License, which permits unrestricted use, distribution, and reproduction in any medium, provided the original author and source are credited.
